# Supplementary material for: Detection of EML4-ALK in Lung Adenocarcinoma Using Pleural Effusion with FISH, IHC, and RT-PCR Methods
Source: PubMed Central journal article supplement (PMC4364974; doi:10.1371/journal.pone.0117032), 2015-03-18

A

1206215 SHenYuBin male 45Y VATANA IHC 2+

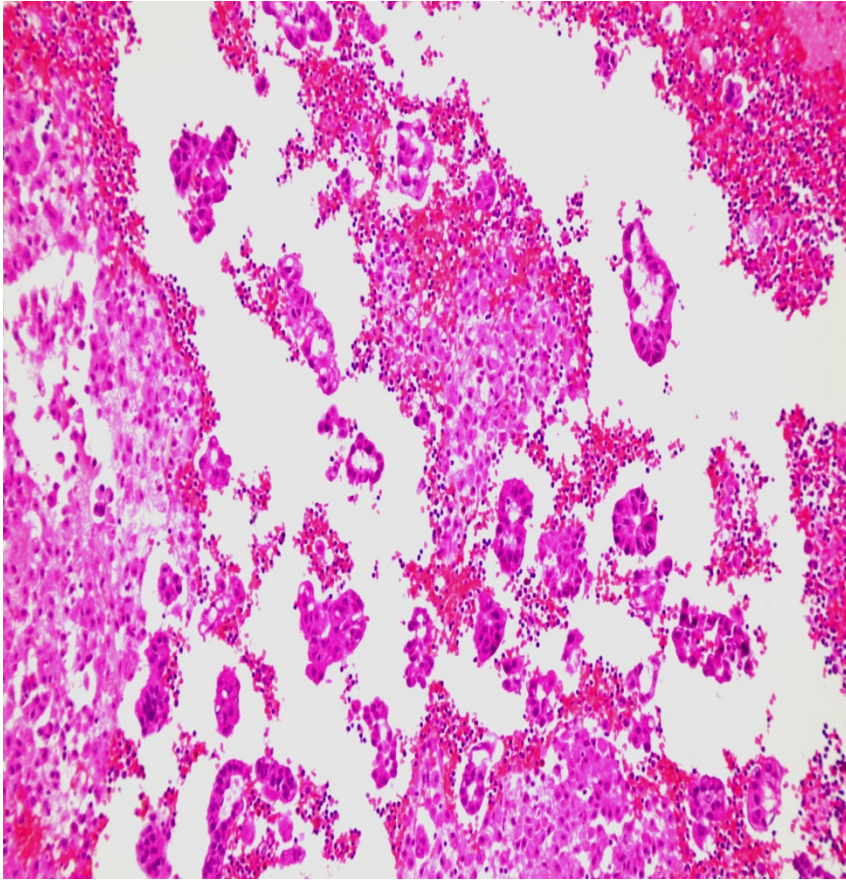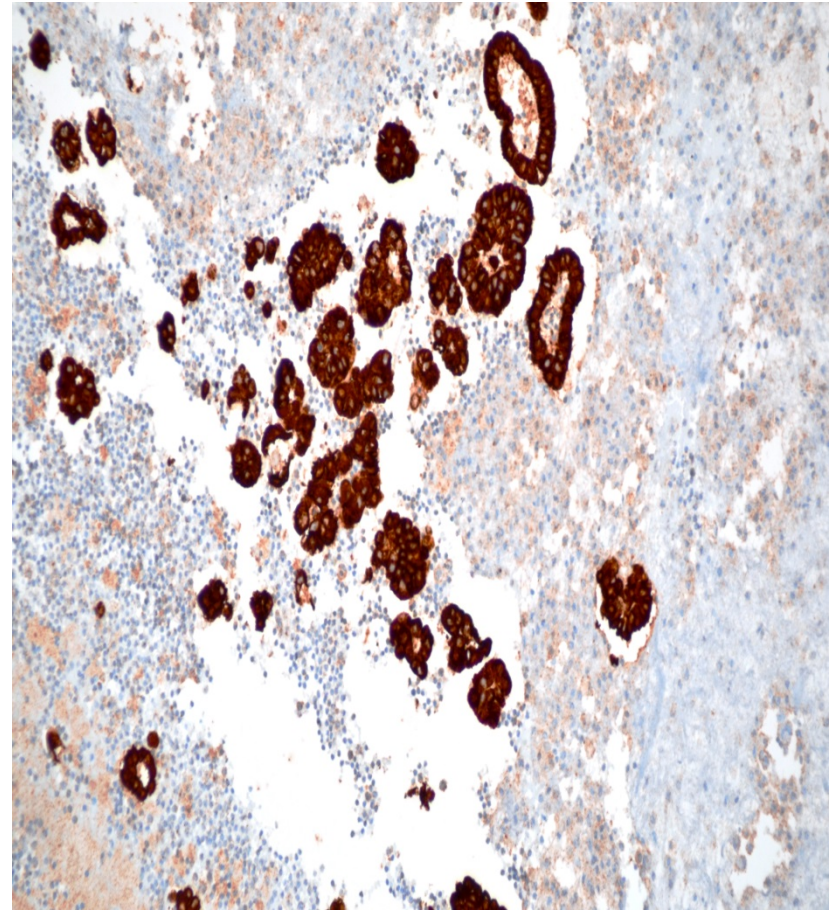

B

1206215 SHenYuBin male 45Y FISH

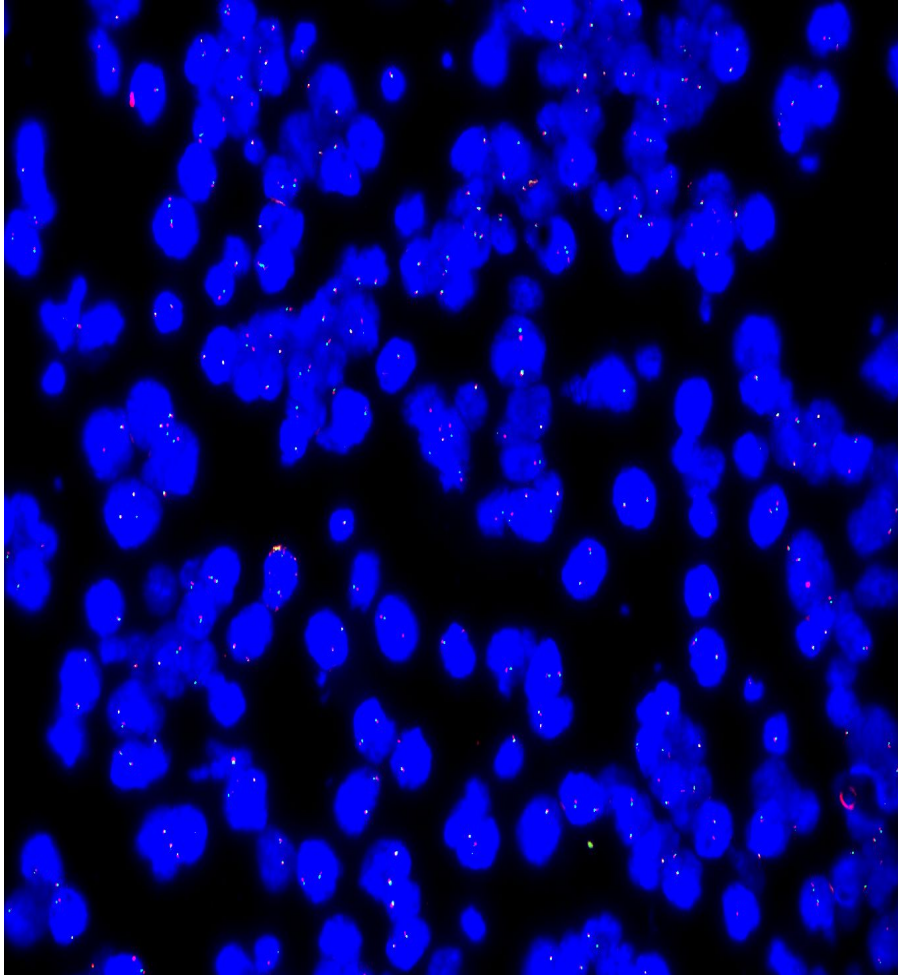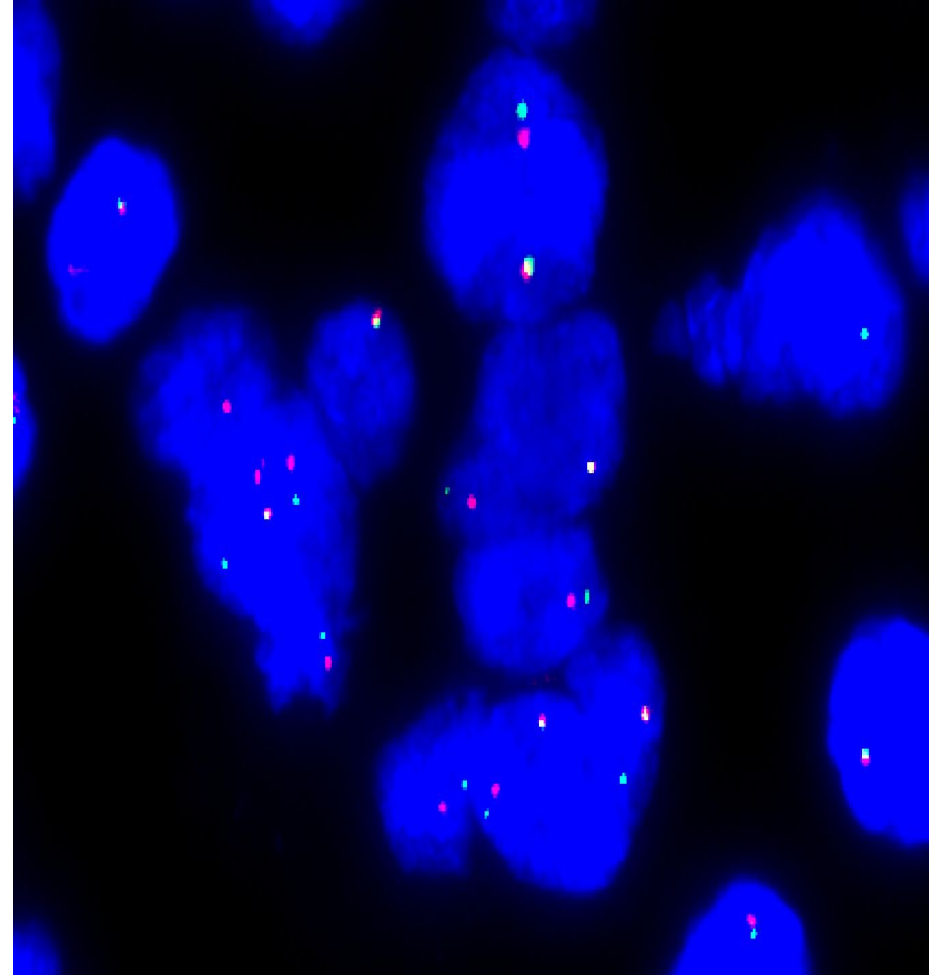

C

1305645 GuoXianFeng male 39y VATANA IHC 2+

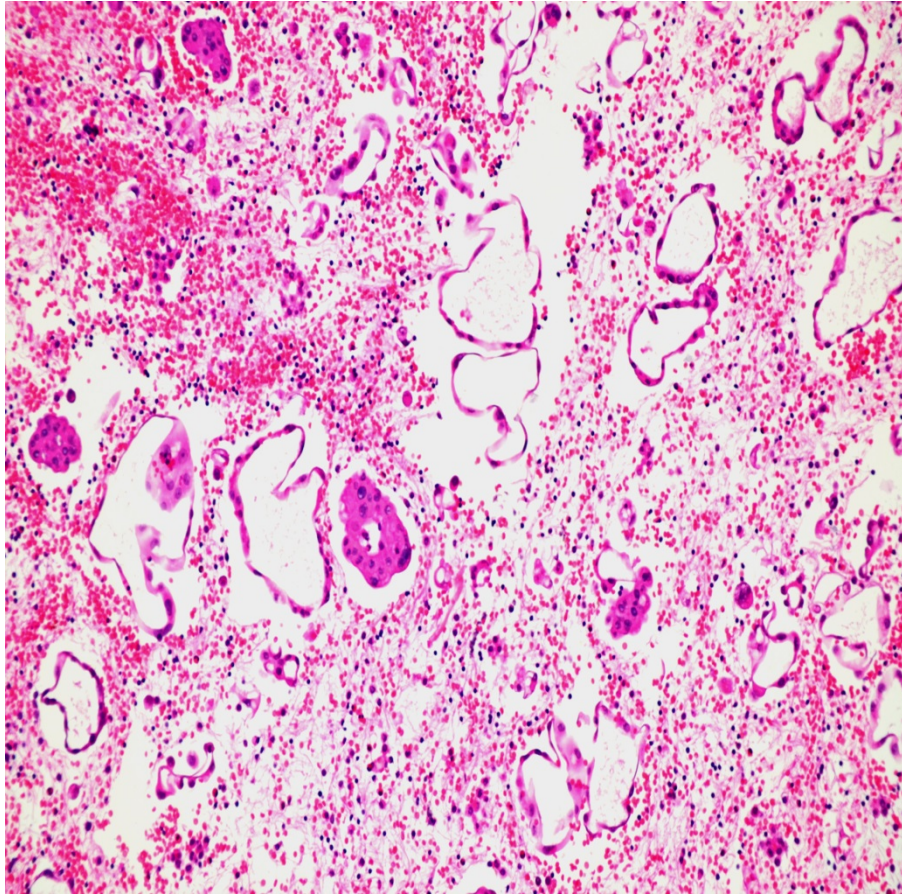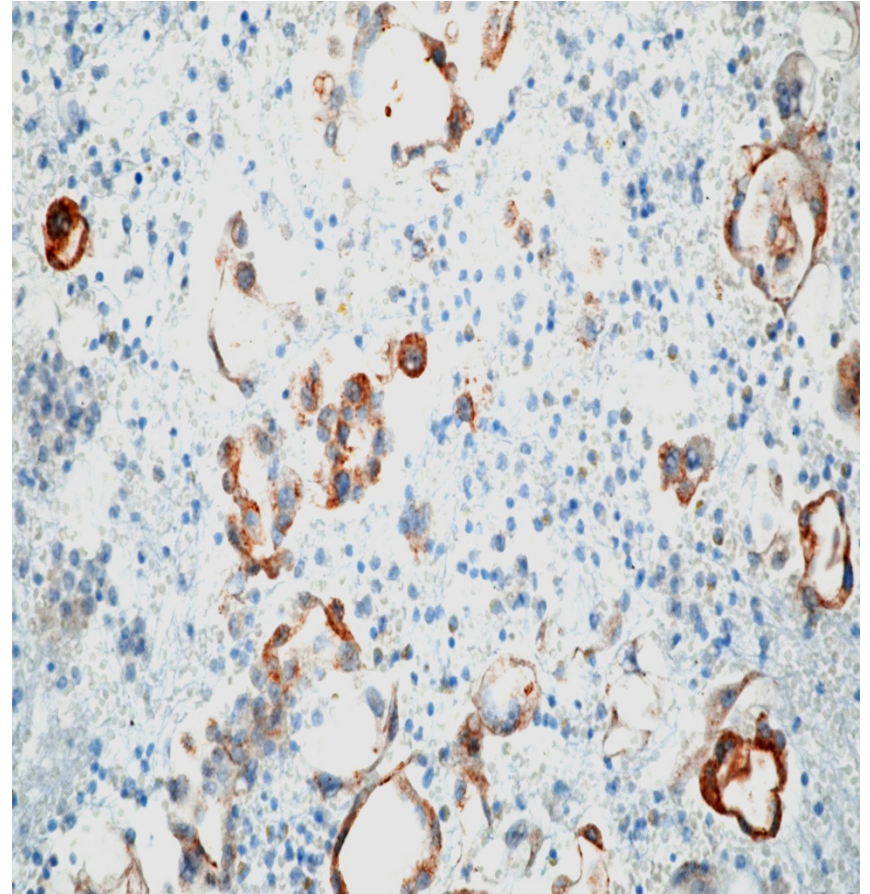

D

1305645 GuoXianFeng male 39y FISH

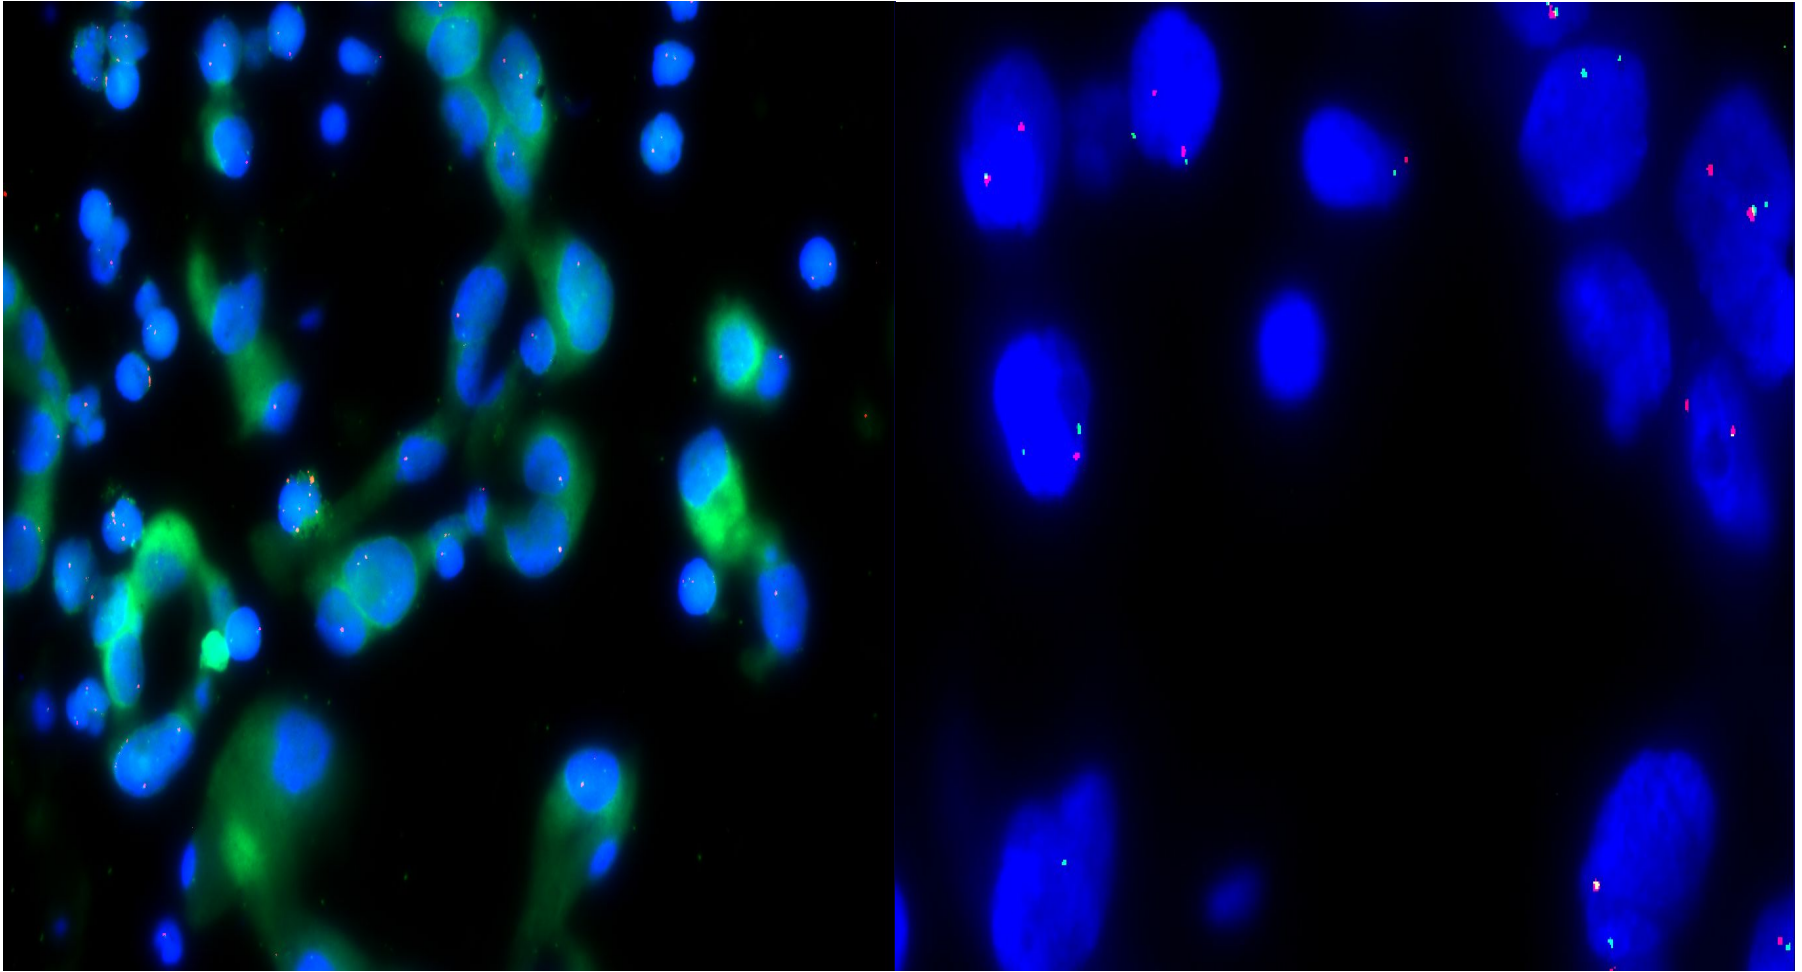

E

H141511 LIDeChao male 55Y VATANA IHC 2+

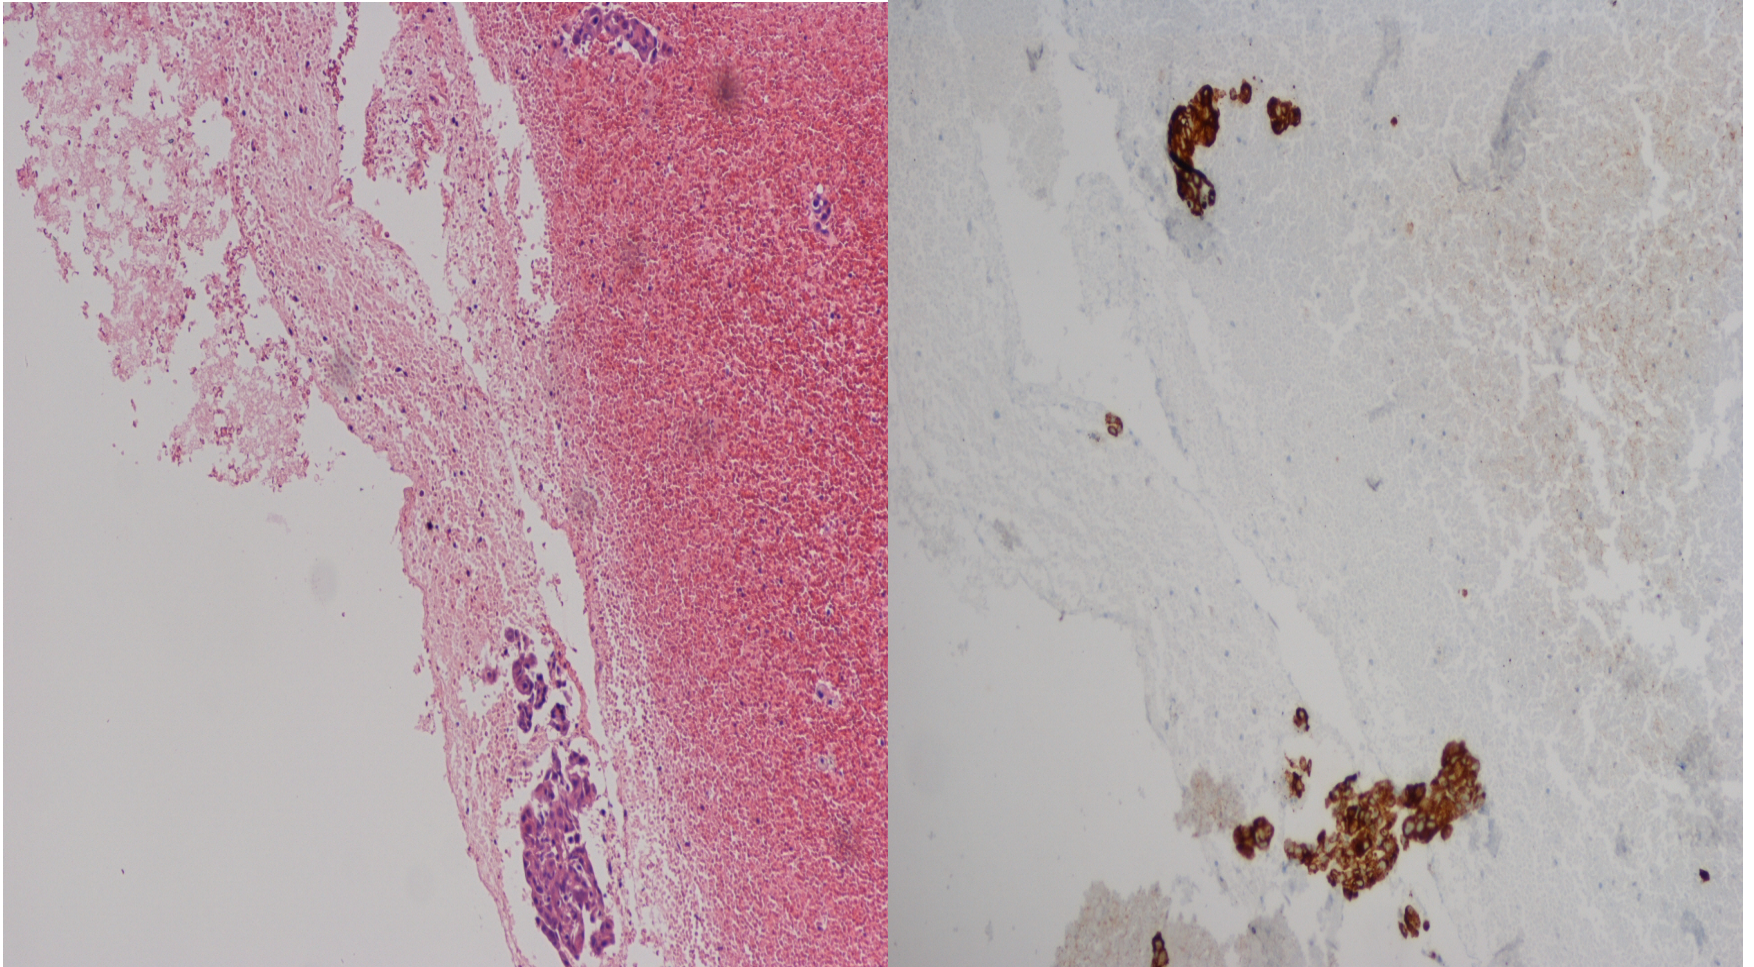

F

1305261 Zhangli female 35y: RT-PCR+, VATANA IHC 1+

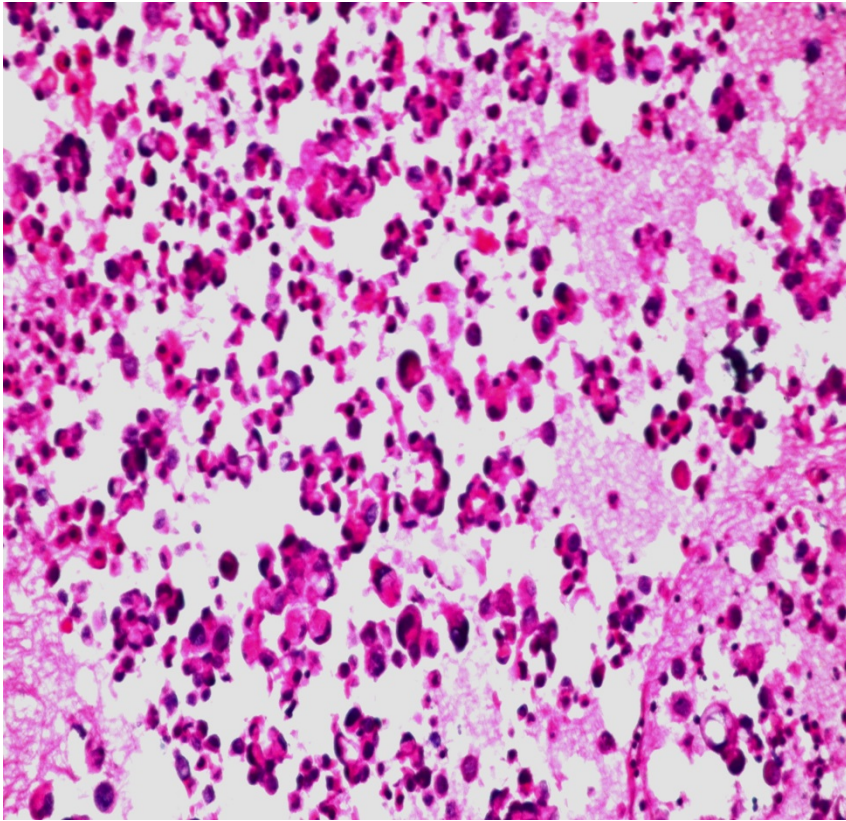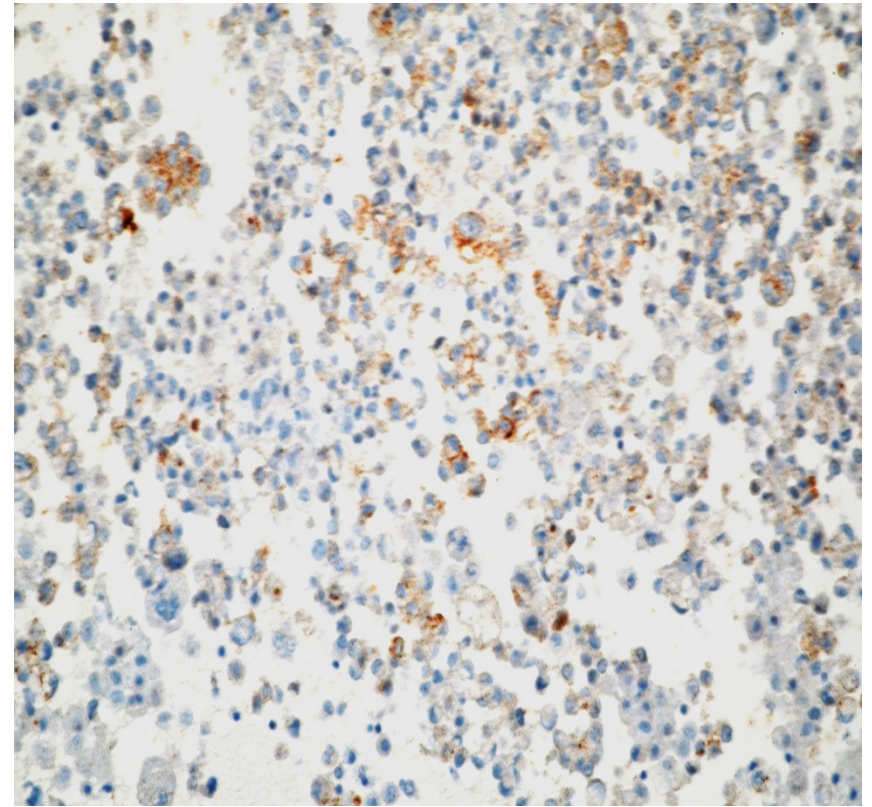

G

1306623 ChenZhangMing male 55y VATANA IHC 1+

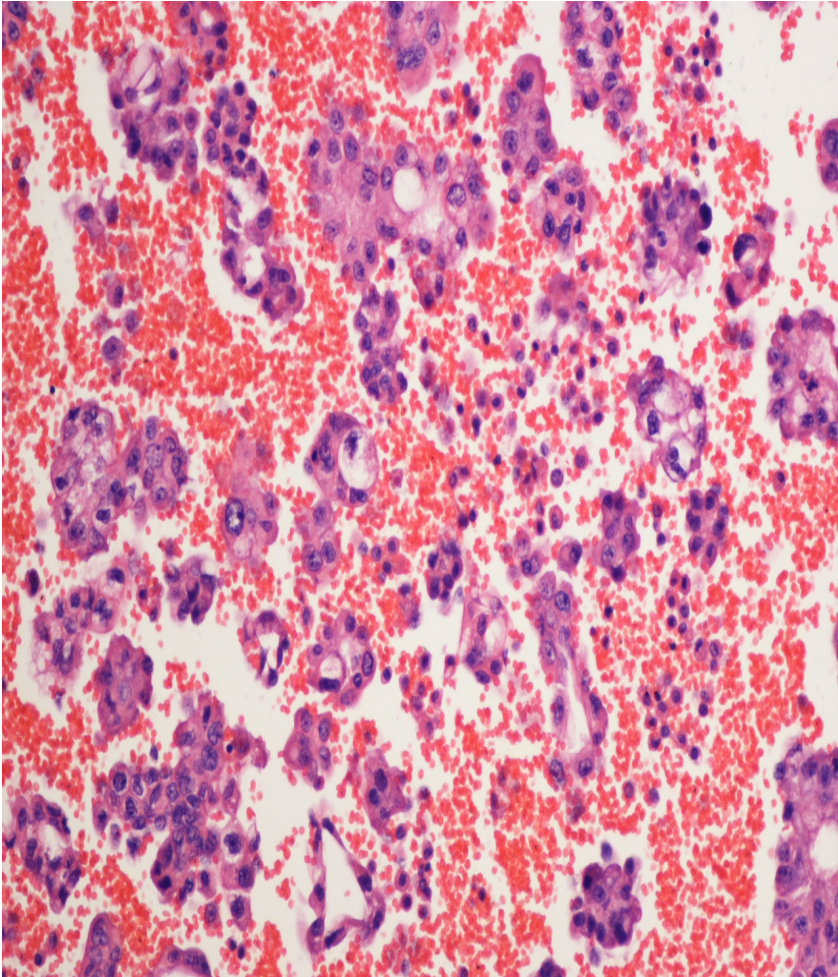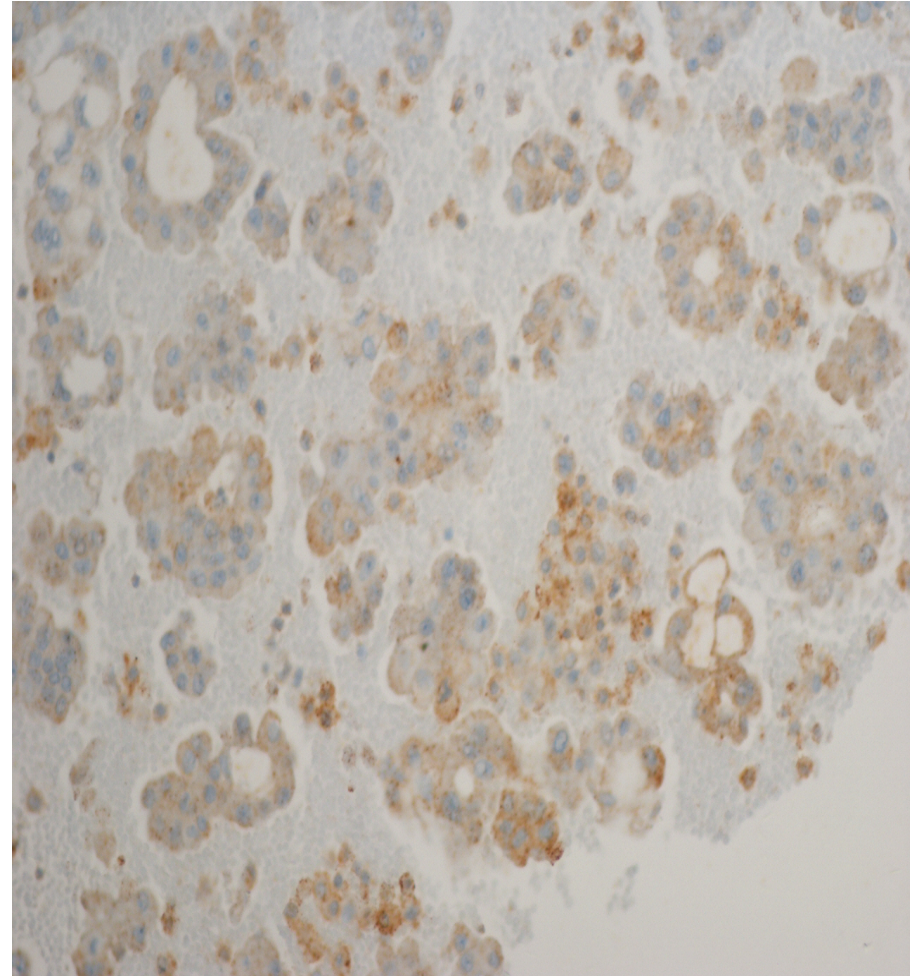

H

1301941 Chen FengChang male 72y VATANA IHC 1+

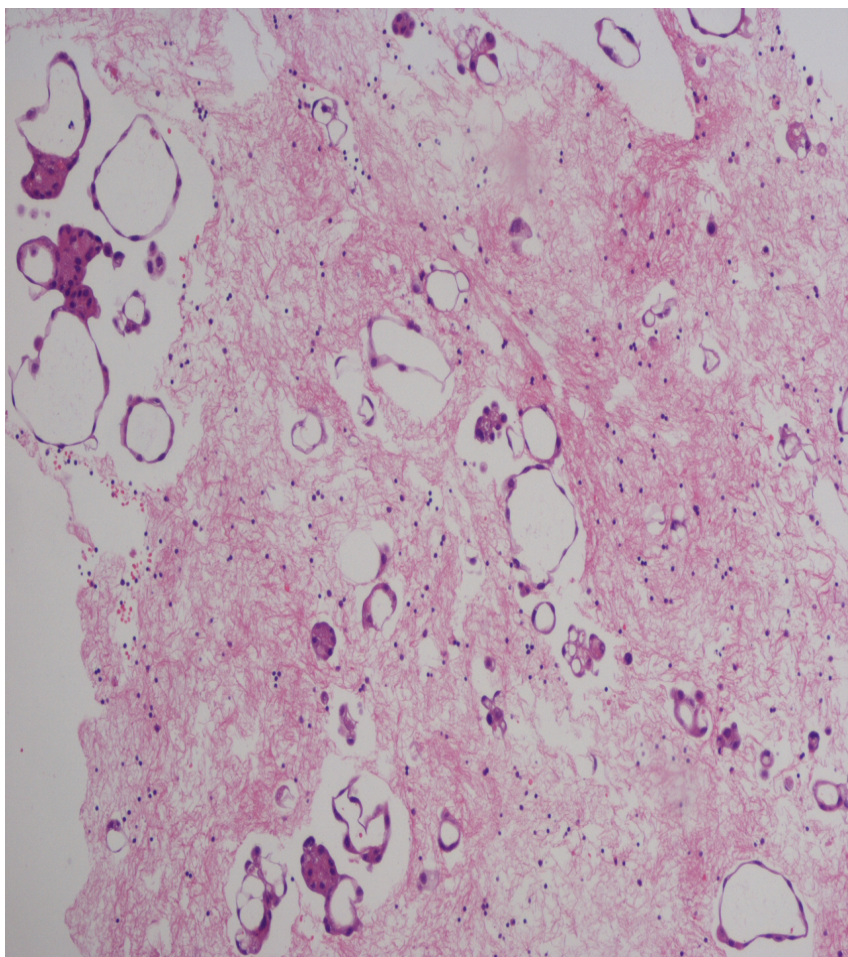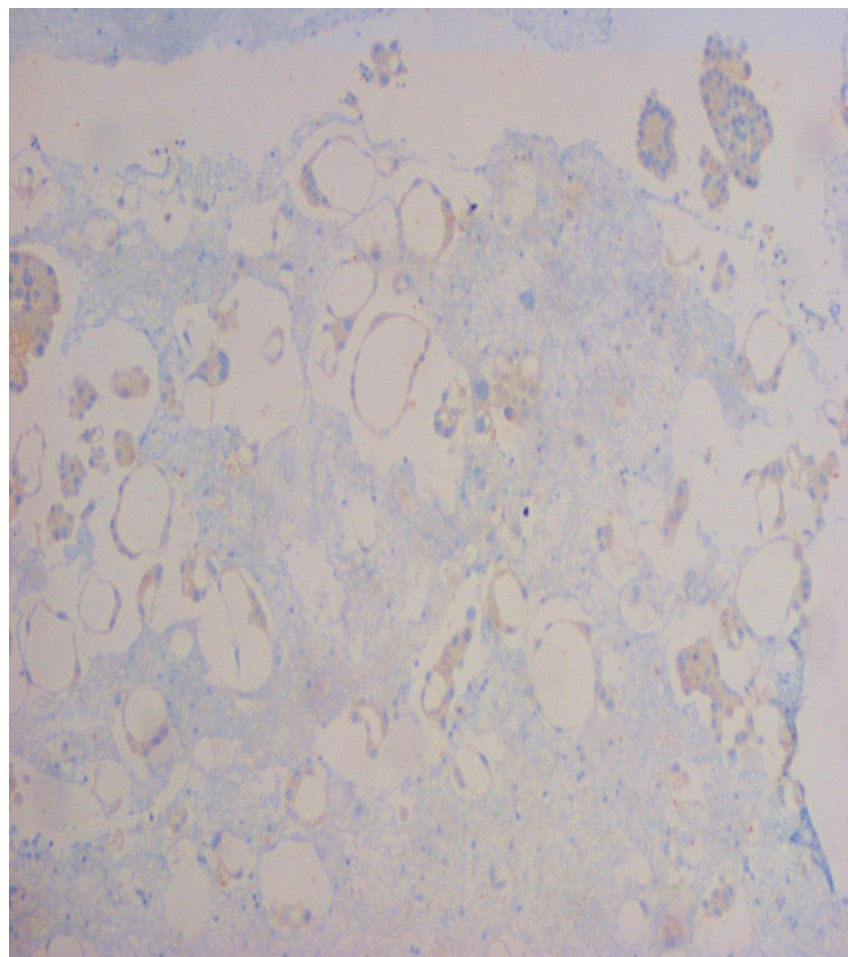

Supplement: pone.0117032.s002.pdf [file pone.0117032.s002.pdf]
